# Supplementary material
Source: Elsevier journal article supplement (https://www.sciencedirect.com/science/article/pii/S0300289622005130)
Supplement: mmc1 [file S0300289622005130:mmc1.pdf]

## EDITORIAL

### **Tromboprofilaxis en pacientes con cáncer y COVID-19.**

Ramón Lecumberri<sup>1,2</sup>, María Marcos-Jubilar<sup>1</sup>, Carolina Guillén<sup>3</sup>.

<sup>1</sup>Servicio de Hematología, Clínica Universidad de Navarra, Pamplona.

<sup>2</sup>CIBER-CV, Instituto de Salud Carlos III, Madrid.

<sup>3</sup>Servicio de Hematología. Clínica Universidad de Navarra, Madrid.

**Correspondencia:** Ramón Lecumberri  
Servicio de Hematología  
Clínica Universidad de Navarra  
Avda. Pío XII 36; 31008 Pamplona  
e-mail: rlecumber@unav.es

**Conflictos de interés:** Los autores no refieren ningún conflicto de interés en relación con este trabajo.

## **Tromboprofilaxis en pacientes con cáncer y COVID-19.**

Desde el inicio de la pandemia de SARS-CoV-2 la tromboprofilaxis fue objeto de especial atención. Pronto quedó patente que los pacientes hospitalizados por COVID-19 debían recibir tromboprofilaxis farmacológica con heparina de bajo peso molecular (HBPM), salvo contraindicación (en línea con lo que desde hace años vienen recomendando las guías de práctica clínica sobre profilaxis antitrombótica en pacientes hospitalizados por un proceso médico agudo). Sin embargo, la descripción inicial de una alta tasa de episodios tromboticos en algunas cohortes de pacientes hospitalizados por COVID-19 a pesar del empleo de dosis profilácticas estándar de HBPM, motivó que diversas sociedades científicas y paneles de expertos sugirieran el empleo de dosis más altas de HBPM en algunos subgrupos de pacientes<sup>1,2</sup>. La evidencia que daba soporte a dichas recomendaciones era muy pobre en ese momento. Además, como cabía esperar, la mayor intensidad de la tromboprofilaxis se asoció con un aumento de complicaciones hemorrágicas<sup>3</sup>.

Los resultados procedentes de ensayos clínicos aleatorizados en los que se han comparado diversas intensidades de profilaxis antitrombótica (estándar, dosis intermedias o terapéuticas de HBPM) en pacientes con COVID-19 hospitalizados han ayudado a dar respuesta a algunas cuestiones, aunque no todas. En pacientes con COVID-19 ingresados en una unidad de cuidados intensivos, el uso de dosis superiores de HBPM a la profilaxis estándar no parece aportar beneficio clínico<sup>4</sup>. En pacientes hospitalizados en planta convencional los resultados son más heterogéneos. En un metaanálisis de datos agregados las dosis terapéuticas de HBPM en comparación con las dosis profilácticas estándar se asocian con una reducción de eventos tromboembólicos, pero un aumento de hemorragias mayores (aunque menor en términos absolutos que la reducción de trombosis) y sin diferencias significativas en mortalidad<sup>5</sup>. Con estos datos, las actualizaciones de varias guías sugieren el empleo de dosis terapéuticas de HBPM frente a la profilaxis estándar en pacientes seleccionados con COVID-19 hospitalizados en planta convencional y que no tengan factores adicionales de riesgo hemorrágico<sup>6-8</sup>. Probablemente, la próxima disponibilidad de metaanálisis de datos individuales de pacientes contribuya a la identificación de aquellos subgrupos de pacientes que más se benefician de esta estrategia. Otras cuestiones de interés que se abordan en las guías es la prolongación de la profilaxis tras el alta hospitalaria (en general no recomendada) o la profilaxis en el paciente no hospitalizado (tampoco recomendada de forma sistemática).

Recientemente se ha publicado la actualización de las guías internacionales de práctica clínica para el tratamiento y prevención del tromboembolismo venoso (TEV) en pacientes con cáncer, promovidas por la Iniciativa Internacional sobre Trombosis y Cáncer (ITAC)<sup>9</sup>. Por primera vez se incluye un epígrafe sobre tratamiento y prevención del TEV en pacientes con cáncer y COVID-19. En este caso, los panelistas sugieren seguir las mismas recomendaciones que en los pacientes con cáncer sin COVID-19. La argumentación para dicha recomendación es doble. Por un lado, que no se ha visto que los pacientes hospitalizados con cáncer y COVID-19 tengan mayor incidencia de TEV que los pacientes con COVID-19 sin cáncer (parecería más conveniente comparar la incidencia de TEV en pacientes con cáncer hospitalizados con y sin COVID-19). Por otra parte, la ausencia de datos específicos en la población oncológica sobre el beneficio y riesgo de las distintas estrategias de profilaxis en pacientes con COVID-19. De hecho, en varios de los

ensayos clínicos comentados anteriormente tener un cáncer activo suponía un criterio de exclusión y en todos se excluían los pacientes con afectación primaria o secundaria del sistema nervioso central.

Los pacientes con cáncer constituyen una población especial por su mayor riesgo trombótico y hemorrágico, de etiología multifactorial<sup>10</sup>. La hospitalización es un reconocido factor de riesgo de TEV en los pacientes con cáncer activo<sup>11</sup>. Por este motivo se recomienda profilaxis rutinaria con HBPM en todos los pacientes con cáncer hospitalizados y que no tengan contraindicación para la misma, excepto si el motivo de ingreso es únicamente la administración de tratamiento oncológico y el paciente no está encamado. No obstante, entre el 3-8% de los pacientes desarrollan un episodio de TEV durante la hospitalización o en los días siguientes tras el alta, a pesar de la tromboprofilaxis<sup>12</sup>.

El dilema está servido, ¿dosis profilácticas estándar como sugiere la guía ITAC enfocada al paciente oncológico o dosis terapéuticas como sugieren las guías más generalistas? (Tabla 1). Lo más sencillo, pero al mismo tiempo menos útil, es dar una respuesta que no vaya más allá de la valoración caso por caso, prestando atención al balance entre riesgo trombótico y hemorrágico de cada paciente. Sin embargo, aunque no hay datos publicados al respecto, cabe la posibilidad de que, en la actualidad, debido a las características de las cepas circulantes del virus, la vacunación generalizada y los avances en el manejo de la enfermedad, el riesgo trombótico asociado al COVID-19 no sea tan importante como en las oleadas iniciales. De ser esto cierto, la validez de los resultados de los ensayos clínicos, realizados mayoritariamente en los inicios de la pandemia, se vería cuestionada, ya que el impacto de las dosis terapéuticas de HBPM en la reducción de eventos trombóticos en términos absolutos sería inferior. Por lo tanto, en este escenario de incertidumbre, y teniendo en cuenta el incremento del riesgo hemorrágico en pacientes con cáncer, no parece descabellado aplicar un principio de prudencia y sugerir que, en general, los pacientes con cáncer y COVID-19 hospitalizados en planta convencional reciban profilaxis estándar con HBPM.

La evidencia es aún menor para poder dar recomendaciones específicas sobre tromboprofilaxis en cáncer y COVID-19 en pacientes que no requieren hospitalización. En la práctica habitual en muchos pacientes que inician tratamiento oncológico no se realiza una valoración del riesgo trombótico, lo que puede conducir a una infrautilización de la tromboprofilaxis ambulatoria. El hecho de que un paciente con cáncer desarrolle COVID-19 debería ser motivo para, si no se había realizado con anterioridad, evaluar el riesgo tromboembólico asociado al proceso oncológico (existen varias escalas validadas)<sup>13</sup>. Muy probablemente en una proporción considerable de pacientes se constataría una indicación de tromboprofilaxis farmacológica, con independencia del COVID-19.

Algunos conceptos tan en boga como medicina personalizada y medicina de precisión no son ajenos al campo de la enfermedad tromboembólica. Las guías de práctica clínica basadas en la evidencia son de gran utilidad, pero, por su naturaleza, no cubren un gran número de circunstancias que no son infrecuentes en el día a día. Aunque los avances científicos poco a

poco vayan acotando estas lagunas del conocimiento, queda un amplio espacio para el arte de la medicina.

### Referencias bibliográficas

1. Mackman N, Antoniak S, Wolberg AS, Kasthuri R, Key NS. Coagulation Abnormalities and Thrombosis in Patients Infected With SARS-CoV-2 and Other Pandemic Viruses. *Arterioscler Thromb Vasc Biol.* 2020 Sep;40(9):2033-2044. doi: 10.1161/ATVBAHA.120.314514.
2. Sociedad Española de Trombosis y Hemostasia (SETH). Recomendaciones de tromboprofilaxis y tratamiento antitrombótico en pacientes con COVID-19. Fecha de publicación: 21 de abril de 2020. Accesible en <https://www.covid-19.seth.es/recomendaciones-de-tromboprofilaxis-y-tratamiento-antitrombotico-en-pacientes-con-covid-19/>
3. Demelo-Rodriguez P, Farfán-Sedano AI, Pedrajas JM, Llamas P, Sigüenza P, Jaras MJ, et al. Bleeding risk in hospitalized patients with COVID-19 receiving intermediate- or therapeutic doses of thromboprophylaxis. *J Thromb Haemost.* 2021 Aug;19(8):1981-1989. doi: 10.1111/jth.15400.
4. REMAP-CAP Investigators; ACTIV-4a Investigators; ATTACC Investigators. Therapeutic Anticoagulation with Heparin in Critically Ill Patients with Covid-19. *N Engl J Med.* 2021 Aug 26;385(9):777-789. doi: 10.1056/NEJMoa2103417.
5. Valeriani E, Porfidia A, Ageno W, Spoto S, Pola R, Di Nisio M. High-dose versus low-dose venous thromboprophylaxis in hospitalized patients with COVID-19: a systematic review and meta-analysis. *Intern Emerg Med.* 2022 Jun 27:1-9. doi: 10.1007/s11739-022-03004-x.
6. Moores LK, Tritschler T, Brosnahan S, Carrier M, Collen JF, Doerschug K, et al. Thromboprophylaxis in Patients With COVID-19: A Brief Update to the CHEST Guideline and Expert Panel Report. *Chest.* 2022 Jul;162(1):213-225. doi: 10.1016/j.chest.2022.02.006.
7. Schulman S, Sholzberg M, Spyropoulos AC, Zarychanski R, Resnick HE, Bradbury C, et al. ISTH guidelines for antithrombotic treatment in COVID-19. *J Thromb Haemost* 2022. doi: 10.1111/jth.15808
8. Cuker A, Tseng EK, Nieuwlaat R, Angchaisuksiri P, Blair C, Dane K, et al. American Society of Hematology living guidelines on the use of anticoagulation for thromboprophylaxis in patients with COVID-19: January 2022 update on the use of therapeutic-intensity anticoagulation in acutely ill patients. *Blood Adv.* 2022 May 3:bloodadvances.2022007561. doi: 10.1182/bloodadvances.2022007561.
9. Farge D, Frere C, Connors JM, Khorana AA, Kakkar A, Ay C, et al. 2022 international clinical practice guidelines for the treatment and prophylaxis of venous thromboembolism in patients with cancer, including patients with COVID-19. *Lancet Oncol.* 2022 Jul;23(7):e334-e347. doi: 10.1016/S1470-2045(22)00160-7.
10. Gervaso L, Dave H, Khorana AA. Venous and Arterial Thromboembolism in Patients With Cancer: JACC: *CardioOncology* State-of-the-Art Review. *JACC CardioOncol.* 2021 Apr 20;3(2):173-190. doi: 10.1016/j.jacc.2021.03.001.

11. Figueroa R, Alfonso A, López-Picazo J, Gil-Bazo I, García-Mouriz A, Hermida J, et al. Insights into venous thromboembolism prevention in hospitalized cancer patients: Lessons from a prospective study. *PLoS One*. 2018 Aug 2;13(8):e0200220. doi: 10.1371/journal.pone.0200220.
12. Figueroa R, Alfonso A, López-Picazo J, Gil-Bazo I, García-Mouriz A, Hermida J, et al. Improvement of appropriate pharmacological prophylaxis in hospitalised cancer patients with a multiscreen e-alert system: a single-centre experience. *Clin Transl Oncol*. 2019 Jun;21(6):805-809. doi: 10.1007/s12094-018-1986-1.
13. Moik F, Ay C, Pabinger I. Risk prediction for cancer-associated thrombosis in ambulatory patients with cancer: past, present and future. *Thromb Res*. 2020 Jul;191 Suppl 1:S3-S11. doi: 10.1016/S0049-3848(20)30389-3.

**Tabla 1: Resumen de las recomendaciones/sugerencias vigentes en diferentes guías de práctica clínica sobre tromboprofilaxis en pacientes con COVID-19 (Julio 2022).**

|                                            | <b>Guía CHEST</b>        | <b>Guía ASH</b>          | <b>Guía ISTH</b>                      | <b>Guía ITAC (cáncer)</b>            |
|--------------------------------------------|--------------------------|--------------------------|---------------------------------------|--------------------------------------|
| Pacientes críticos                         | Profilaxis estándar      | Profilaxis estándar      | Profilaxis estándar                   | na                                   |
| Pacientes agudos (planta convencional)     | Dosis terapéuticas HBPM* | Dosis terapéuticas HBPM* | Dosis terapéuticas HBPM*              | Profilaxis estándar                  |
| Prolongación de la profilaxis tras el alta | No recomendada           | No recomendada           | Considerar en pacientes seleccionados | No recomendada                       |
| Pacientes no hospitalizados                | na                       | na                       | Considerar sulodexida <sup>#</sup>    | Según riesgo individual <sup>^</sup> |

\* Pacientes seleccionados con bajo riesgo hemorrágico

<sup>#</sup> Pacientes con alto riesgo de progresión de la enfermedad, para reducir riesgo de hospitalización.

<sup>^</sup> Seguir las mismas recomendaciones que en los pacientes con cáncer sin COVID-19

na. no aplica
